# Supplementary material
Source: Research Square preprint supplement (doi:10.21203/rs.3.rs-8948047/v1)
Supplement: Supplementary file 1 [file 9db02f6824a506afaba03393.docx]

# Supplementary Material

## Sociodemographics

Categorical variables were summarized as absolute and relative frequencies (n, %) for the total sample and separately stratified by CM status (CM = 0 vs. CM = 1). The following sociodemographic variables were examined: gender (male, female, diverse), age (<30, 30–39, 40–49, 50–59, 60–69, >70 years), marital status (married/living together, married/living apart, unmarried, divorced, widowed), partner cohabitation (living with partner, not living with partner), migration background (yes, no), monthly family net household income (<1,250€, 1,250–2,500€, 2,500–3,500€, >3,500€), highest level of education (school not finished/still in school, compulsory school, higher education, university degree), and employment status (full-time employment, part-time employment, unemployed, in training, retired). In the raw data, special codes for missing values (-1, -2) were recoded to missing (NaN); for variables with missing or undefined responses, these were collapsed into an explicit "Other/Missing" or "Missing" category where appropriate. Associations between CM status and categorical variables were examined using Pearson's χ² tests; for 2×2 contingency tables we report φ, and for tables with more than two categories we report Cramér's V as an effect size measure.

Participants with CM experience differed significantly from those without CM experience in several sociodemographic variables. Marital status showed a small but significant association with CM exposure (χ²(4) = 12.42, p = .015, V = 0.07): participants with CM were more often divorced (18.4 %) than those without (14.5 %) and less often married or cohabiting (35.8 % vs. 42.3 %). CM was also associated with migration background (χ²(1) = 13.26, p < .001, Φ = 0.08); participants with CM more frequently reported a migration background (9.5 %) than those without (5.5 %). Regarding monthly household income, significant differences were found (χ²(4) = 24.23, p < .001, V = 0.10). Participants with CM more often belonged to the lowest income group (< 1,250 €, 15.9 % vs. 10.3 %) and less often to the highest income group (> 3,500 €, 19.9 % vs. 24.8 %). Similarly, educational attainment differed significantly between groups (χ²(4) = 29.55, p < .001, V = 0.11): participants with CM more often had no or only compulsory school education (43.9 %) and less often higher education qualifications (46.1 %) compared to those without CM (38.9 % and 50.9 %, respectively). Employment status was significantly associated with CM exposure (χ²(5) = 42.48, p < .001, V = 0.14). Individuals with CM were less likely to be in full-time employment (36.7% vs. 48.7%) and more likely to be unemployed (10.2% vs. 5.3%) or retired (30.0% vs. 25.8%). Overall, the effect sizes (Φ / Cramér’s V = 0.07–0.14) indicate small associations between CM exposure and sociodemographic characteristics, mainly reflecting lower socioeconomic status among participants with CM. We observed no significant group differences regarding gender (χ²(2) = 0.68, p = .711, V = 0.02), age group (χ²(5) = 5.59, p = .348, V = 0.05) and the proportion of participants living with a partner (χ²(1) = 0.84, p = .359, Φ = 0.03). Complete descriptive statistics for all sociodemographic variables stratified by CM status are provided in Supplementary Table S1.

| *Supplementary table S1: Sociodemographic data of the total sample as well as for participants with and without experienced CM* | | | | | | | | | |
| --- | --- | --- | --- | --- | --- | --- | --- | --- | --- |
|  | Total sample  (n=2,318) | | Participants without CM (n=1,441) | | Participants with CM (n=877) | |  |  |  |
|  | n | % | n | % | n | % | χ2 | p-value | Φ / V |
| **Gender** |  |  |  |  |  |  | 0.681 | 0.71 | 0.017 |
| male | 1110 | 47.89 | 693 | 48.09 | 417 | 47.55 |  |  |  |
| female | 1207 | 52.07 | 747 | 51.84 | 460 | 52.45 |  |  |  |
| diverse | 1 | 0.04 | 1 | 0.07 | 0 | 0 |  |  |  |
| **Age** |  |  |  |  |  |  | 5.593 | 0.34 | 0.049 |
| <30 years | 382 | 16.48 | 240 | 16.66 | 142 | 16.19 |  |  |  |
| 30–39 years | 323 | 13.93 | 219 | 15.2 | 104 | 11.86 |  |  |  |
| 40–49 years | 363 | 15.66 | 222 | 15.41 | 141 | 16.08 |  |  |  |
| 50–59 years | 466 | 20.10 | 283 | 19.64 | 183 | 20.87 |  |  |  |
| 60–69 years | 418 | 18.03 | 255 | 17.7 | 163 | 18.59 |  |  |  |
| >70 years | 366 | 15.79 | 222 | 15.41 | 144 | 16.42 |  |  |  |
| **Marital Status** |  |  |  |  |  |  | 12.415 | 0.01 | 0.073 |
| Married / living together | 924 | 39.86 | 610 | 42.33 | 314 | 35.8 |  |  |  |
| Married / living apart | 40 | 1.73 | 22 | 1.53 | 18 | 2.05 |  |  |  |
| unmarried | 726 | 31.32 | 441 | 30.6 | 285 | 32.5 |  |  |  |
| divorced | 370 | 15.96 | 209 | 14.5 | 161 | 18.36 |  |  |  |
| widowed | 254 | 10.96 | 157 | 10.9 | 97 | 11.06 |  |  |  |
| missing | 4 | 0.17 | 2 | 0.14 | 2 | 0.23 |  |  |  |
| **Living with partner** |  |  |  |  |  |  | 0.841 | 0.36 | 0.025 |
| living with partner | 300 | 12.94 | 639 | 44.34 | 129 | 14.71 |  |  |  |
| not living with partner | 1066 | 45.99 | 171 | 11.87 | 427 | 48.69 |  |  |  |
| missing | 952 | 41.07 | 631 | 43.79 | 321 | 36.6 |  |  |  |
| **Migration background** |  |  |  |  |  |  | 13.264 | <.001 | 0.076 |
| No | 2147 | 92.62 | 1356 | 94.1 | 791 | 90.19 |  |  |  |
| Yes | 162 | 6.99 | 79 | 5.48 | 83 | 9.46 |  |  |  |
| missing | 9 | 0.39 | 6 | 0.42 | 3 | 0.34 |  |  |  |
| **Monthly family net household income** |  |  |  |  |  |  | 24.225 | <.001 | 0.102 |
| < 1,250 € | 288 | 12.42 | 149 | 10.34 | 139 | 15.85 |  |  |  |
| 1,250 – 2,500 € | 942 | 40.64 | 571 | 39.63 | 371 | 42.3 |  |  |  |
| 2,500 – 3,500 € | 513 | 22.13 | 340 | 23.59 | 173 | 19.73 |  |  |  |
| > 3,500€ | 532 | 22.95 | 357 | 24.77 | 175 | 19.95 |  |  |  |
| missing | 43 | 1.86 | 24 | 1.67 | 19 | 2.17 |  |  |  |
| **Highest level of education** |  |  |  |  |  |  | 29.551 | <.001 | 0.113 |
| school not finished / still in school | 89 | 3.8 | 33 | 2.29 | 56 | 6.39 |  |  |  |
| compulsory school | 857 | 37 | 528 | 36.64 | 329 | 37.51 |  |  |  |
| higher education | 1137 | 49.1 | 733 | 50.87 | 404 | 46.07 |  |  |  |
| university degree | 230 | 9.9 | 142 | 9.85 | 88 | 10.03 |  |  |  |
| other/missing | 5 | 0.2 | 5 | 0.35 | 0 | 0 |  |  |  |
| **Employment** |  |  |  |  |  |  | 42.477 | <.001 | 0.135 |
| full time employment | 1024 | 44.3 | 702 | 48.72 | 322 | 36.72 |  |  |  |
| part time employment | 321 | 13.9 | 189 | 13.12 | 132 | 15.05 |  |  |  |
| unemployed | 165 | 7.1 | 76 | 5.27 | 89 | 10.15 |  |  |  |
| in training | 154 | 6.7 | 89 | 6.18 | 65 | 7.41 |  |  |  |
| retired | 635 | 27.5 | 372 | 25.82 | 263 | 29.99 |  |  |  |
| other/missing | 19 | 0.9 | 13 | 0.9 | 6 | 0.68 |  |  |  |

| *Supplementary table S2: Model Performance for each Outcome* | | | | |
| --- | --- | --- | --- | --- |
| Outcome | Model | cvR² [95% CrI] | MAE [95% CrI] | RMSE [95% CrI] |
| CPTSD | Magnitude + Structure + Timing | 0.25 [0.19, 0.31] | 7.34 [6.98, 7.72] | 9.19 [8.75, 9.66] |
|  | Magnitude + Structure | 0.25 [0.19, 0.31] | 7.35 [6.99, 7.73] | 9.20 [8.76, 9.69] |
|  | Magnitude | 0.23 [0.17, 0.29] | 7.51 [7.15, 7.89] | 9.32 [8.87, 9.81] |
|  | Severity | 0.22 [0.16, 0.28] | 7.58 [7.22, 7.96] | 9.37 [8.91, 9.88] |
|  | Count | 0.18 [0.13, 0.24] | 7.66 [7.28, 8.06] | 9.60 [9.10, 10.15] |
|  | Frequency | 0.13 [0.08, 0.18] | 8.03 [7.65, 8.43] | 9.90 [9.42, 10.42] |
|  | Duration | 0.10 [0.06, 0.15] | 8.16 [7.77, 8.57] | 10.06 [9.58, 10.58] |
|  | Baseline | −0.00 [−0.01, −0.00] | 8.62 [8.22, 9.06] | 10.63 [10.10, 11.21] |
| DSO | Magnitude + Structure | 0.23 [0.18, 0.29] | 4.87 [4.61, 5.14] | 6.19 [5.87, 6.53] |
|  | Magnitude + Structure + Timing | 0.23 [0.18, 0.29] | 4.88 [4.62, 5.15] | 6.19 [5.88, 6.54] |
|  | Magnitude | 0.20 [0.14, 0.26] | 4.99 [4.73, 5.27] | 6.33 [6.00, 6.70] |
|  | Severity | 0.19 [0.12, 0.24] | 5.01 [4.75, 5.30] | 6.38 [6.04, 6.77] |
|  | Count | 0.17 [0.12, 0.22] | 5.06 [4.80, 5.35] | 6.43 [6.08, 6.82] |
|  | Frequency | 0.12 [0.08, 0.17] | 5.26 [4.99, 5.55] | 6.62 [6.28, 7.01] |
|  | Duration | 0.10 [0.05, 0.14] | 5.41 [5.14, 5.69] | 6.72 [6.38, 7.09] |
|  | Baseline | −0.00 [−0.01, −0.00] | 5.68 [5.40, 5.99] | 7.07 [6.71, 7.49] |
| PTBS | Magnitude + Structure + Timing | 0.16 [0.10, 0.21] | 3.83 [3.64, 4.02] | 4.65 [4.43, 4.89] |
|  | Magnitude + Structure | 0.15 [0.10, 0.21] | 3.83 [3.64, 4.02] | 4.66 [4.44, 4.90] |
|  | Severity | 0.15 [0.10, 0.20] | 3.84 [3.65, 4.04] | 4.67 [4.45, 4.91] |
|  | Magnitude | 0.15 [0.10, 0.21] | 3.86 [3.67, 4.05] | 4.67 [4.45, 4.91] |
|  | Count | 0.11 [0.06, 0.16] | 3.95 [3.76, 4.15] | 4.79 [4.56, 5.04] |
|  | Frequency | 0.10 [0.05, 0.15] | 3.99 [3.80, 4.18] | 4.80 [4.57, 5.05] |
|  | Duration | 0.05 [0.02, 0.09] | 4.12 [3.92, 4.32] | 4.93 [4.70, 5.17] |
|  | Baseline | −0.00 [−0.01, −0.00] | 4.24 [4.04, 4.44] | 5.07 [4.84, 5.33] |
| PHQ-4 | Magnitude + Structure | 0.15 [0.09, 0.20] | 1.84 [1.76, 1.94] | 2.31 [2.19, 2.46] |
|  | Magnitude + Structure + Timing | 0.15 [0.09, 0.20] | 1.84 [1.76, 1.94] | 2.31 [2.19, 2.47] |
|  | Magnitude | 0.14 [0.09, 0.19] | 1.85 [1.76, 1.95] | 2.32 [2.20, 2.47] |
|  | Severity | 0.14 [0.08, 0.19] | 1.85 [1.76, 1.95] | 2.33 [2.20, 2.48] |
|  | Count | 0.11 [0.07, 0.16] | 1.89 [1.80, 1.99] | 2.36 [2.24, 2.51] |
|  | Frequency | 0.10 [0.05, 0.14] | 1.90 [1.81, 2.00] | 2.38 [2.26, 2.53] |
|  | Duration | 0.06 [0.02, 0.10] | 1.95 [1.85, 2.05] | 2.43 [2.30, 2.58] |
|  | Baseline | −0.00 [−0.01, −0.00] | 2.02 [1.92, 2.13] | 2.51 [2.38, 2.67] |
| *Note. Values are posterior medians with 95% credible intervals (CrI) from Bayesian bootstrap. Models ordered by R² within each outcome. cvR² = cross-validated R² from leave-one-out cross-validation; MAE = mean absolute error; RMSE = root mean squared error. Baseline = intercept-only model.* | | | | |

| *Supplementary table S3: Labels, item content and item wording for the iCAST-R* | | |
| --- | --- | --- |
| Label | Item Content | Item Wording |
| Abandonment Threat | Threat of removal from home | Before you were age 18, did anyone threaten to abandon you, or refuse to let you live in the house anymore? |
| Birth Rejection | Statements wishing respondent had never been born or was dead | Before you were age 18, did anyone say that they wish you had never been born, or were dead? |
| Verbal Belittling | Insults targeting worth or intelligence | When you were growing up (before age 18), did anyone insult and criticize you, to make you feel that you were bad, stupid or worthless? |
| Love Rejection | Statements that respondent was unloved or undeserving of love | Before you were age 18, did anyone say that you were not loved or did not deserve to be loved? |
| Harm Threat | Direct threats of serious physical harm or death | Before age 18, were you ever personally threatened that you would be badly hurt or killed? |
| Object Beating | Physical assault using an object | Before you were age 18, did anyone ever beat you very hard with an object like a stick, cane, whip or belt? |
| Sharp-Object Injury | Assault involving a knife or sharp object | Before you were 18, did anyone ever stab or cut you with a knife or sharp object? |
| Physical Punching | Hard hitting or punching | When you were growing up (before age 18), did any person ever hit or punch you very hard? |
| Physical Kicking | Forceful kicking | Before you were age 18, did any person ever kick you very hard? |
| Physical Shaking | Violent shaking | Before you were 18, did anyone shake you very hard? |
| Clothing Neglect | Failure to provide adequate clothing despite resources | Were you made to wear clothes that were dirty, torn, or inappropriate for the season when your parent(s) or other responsible adult(s) could afford it? |
| Food Neglect | Failure to provide sufficient food or drink despite resources | Have you ever not been given food to eat and/or drink even though your parent(s) or other responsible adult(s) could afford it? |
| Supervision Neglect | Injury resulting from inadequate supervision | Have you ever been hurt or injured because no adult was supervising you? |
| Housing Neglect | Failure to provide a safe living environment despite resources | Did your parent(s) or other responsible adult(s) not always provide a safe place to live even though they could afford it? |
| Medical Neglect | Failure to provide care during illness or injury despite resources | Were you ever not taken care of by your parent(s) or other responsible adult(s) when you were sick or injured even though they could afford it? |
| Sexual Exposure | Forced viewing or display of private parts | When you were growing up (before age 18), did anyone make you look at their private part or looked at yours when you did not want to? |
| Sexual Media Coercion | Coerced participation in sexual photos or videos | Before age 18, did someone make a sex video or take photographs of you alone, or with other people, doing sexual things when you did not want to? |
| Forced Intercourse | Non-consensual sexual intercourse | Before you were age 18, did anyone ever have sexual intercourse with you when you did not want them to? |
| Sexual Harassment | Unwanted sexual comments or written communication | Before age 18, did anyone make you upset by speaking to you in a sexual way or writing sexual things about you when you did not want to? |
| Sexual Contact | Unwanted sexual touching | Before age 18, did anyone touch your private parts in a sexual way, or make you touch theirs when you did not want to? |

| *Supplementary table S4: Bayesian Linear Regression Results: Age Effects on Childhood Maltreatment Severity* | | | | | |
| --- | --- | --- | --- | --- | --- |
| **Experience** | ***n*** | **β** | ***SE*(β)** | **95% CrI** | ***P*(β < 0)** |
| Abandonment Threat | 465 | −0.09 | 0.01 | −0.12, −0.06 | 1.00 |
| Birth Rejection | 157 | −0.09 | 0.02 | −0.13, −0.05 | 1.00 |
| Verbal Belittling | 1852 | −0.01 | 0.01 | −0.02, 0.01 | 0.82 |
| Love Rejection | 463 | −0.02 | 0.01 | −0.04, 0.01 | 0.90 |
| Harm Threat | 110 | −0.01 | 0.03 | −0.06, 0.04 | 0.67 |
| Object Beating | 693 | −0.00 | 0.01 | −0.03, 0.02 | 0.52 |
| Sharp-Object Injury | 33 | −0.09 | 0.05 | −0.18, 0.00 | 0.97 |
| Physical Punching | 1519 | −0.00 | 0.01 | −0.02, 0.01 | 0.67 |
| Physical Kicking | 356 | 0.00 | 0.02 | −0.03, 0.03 | 0.45 |
| Physical Shaking | 248 | 0.02 | 0.02 | −0.01, 0.06 | 0.08 |
| Clothing Neglect | 339 | −0.02 | 0.02 | −0.05, 0.01 | 0.89 |
| Food Neglect | 248 | 0.01 | 0.02 | −0.03, 0.04 | 0.38 |
| Supervision Neglect | 669 | 0.02 | 0.01 | −0.01, 0.04 | 0.09 |
| Housing Neglect | 137 | 0.03 | 0.03 | −0.02, 0.07 | 0.16 |
| Medical Neglect | 361 | −0.03 | 0.01 | −0.06, −0.00 | 0.99 |
| Sexual Exposure | 233 | −0.06 | 0.02 | −0.10, −0.02 | 1.00 |
| Sexual Media Coercion | 41 | −0.10 | 0.04 | −0.17, −0.03 | 1.00 |
| Forced Intercourse | 96 | −0.12 | 0.03 | −0.19, −0.06 | 1.00 |
| Sexual Harassment | 142 | −0.05 | 0.03 | −0.12, 0.01 | 0.95 |
| *Note. EA = Emotional Abuse; PA = Physical Abuse; PN = Physical Neglect; SA = Sexual Abuse. n = number of observations; β = slope coefficient (standardized change in severity per year of age); SE = posterior standard error; CrI = Bayesian credible interval; P(β < 0) = posterior probability that severity decreases with age. All severity measures were z-standardized within subtype.* | | | | | |
